# Supplementary material for: An integrative and citizen science based approach to the rediscovery and redescription of the only known high-altitude endemic Pill Millipede, Glomeris aurita Koch (Diplopoda, Glomerida)
Source: PeerJ. 2018 Sep 13;6:e5569. doi: 10.7717/peerj.5569 (PMC6139249; doi:10.7717/peerj.5569)
Supplement: Supplemental Information 1 — Striation measured in all specimens of Glomeris aurita and Glomeris oblongoguttata, sorted by locality. [file peerj-06-5569-s001.xls]

## Sheet: Locality
Nummer	NAZIONE	REGIONE	PROV	COMUNE	LOCALITA	QUOTA	RACGIOR1	RACGIOR2	RACMESE1	RACMESE2	RACANNO1	RACNOME	Number	Species	Specimen	Bemerkung
Nr.I	Italia	Lombardia	Bergamo	Oltre il Colle	Valle d'Arera	2000	3		8		2014	Valle	none	Glomeris aurita	11
Nr.II	Italia	Lombardia	Bergamo	Schilpario	Pendici Cimone della Bagozza, macereto	1700	18	8	10	6	2005/2006		none	Glomeris aurita	2 M	mazeriert
Nr.III	Italia	Lombardia	Bergamo	Oltre il Colle	Valle d'Arera	2050	4	29	8	9	2004		none	Glomeris aurita	5
Nr.IV	Italia	Lombardia	Bergamo	Oltre il Colle	Valle d'Arera	2050	22	1	7	10	2003		none	Glomeris aurita	19	alle gequetscht
Nr.V	Italia	Lombardia	Bergamo	San Giovanni Bianco	Pozzo sul Monte Cancerno		2		6		1955	Bonino	none	Glomeris aurita	1
Nr.VI	Italia	Lombardia	Bergamo	Gandellino	Baita Alta fontana Mora	2100	25		7		1984	Bonacina, Pisoni, Valle	none	Glomeris aurita	2 M, 1 F
Nr.VII	Italia	Lombardia	Bergamo	Oltre il Cole	Piano Palla, locality Forca Larga, N of Skilift	1479					2009		ZFMK-MYR#110	Glomeris aurita	11
Nr.VIII	Italia	Lombardia	Bergamo	Roncobello	Around Corno Branchino and Lago Branchino	1794					2009		ZFMK-MYR#248	Glomeris aurita	1 M, 1 F
Nr.IX	Italia	Lombardia	Bergamo	Valle Valzurio	Oltressenda Alta, Rifugio Rino Olme	1814					2009		ZFMK-MYR#115	Glomeris aurita	3
Nr.X	Italia	Lombardia	Bergamo	Oltre il Cole	Lebend aus Bergamo						2014			Glomeris aurita	5 F
Nr.XI	Italia	Lombardia	Brescia	Ponte Saviore			31		7		1964	Negri	49	Glomeris oblongoguttata	4
Nr.XII	Italia	Lombardia	Bergamo	Bergamo	Astino		15		11		1964	Valle, Bianchi	none	Glomeris oblongoguttata	1
Nr.XIII	Italia	Lombardia	Bergamo	Dossena	Baite del Menna	1300-1400	29		7		1963	Bianchi	29	Glomeris oblongoguttata	2
Nr.XIV	Italia	Lombardia	Brescia	Ponte Saviore	in pineta sopra il mulino		23		8		1963	Negri	60	Glomeris oblongoguttata	3
Nr.XV	Italia	Lombardia	Bergamo	"Bergamo"	Maresana		3		8		1965		3	Glomeris oblongoguttata	1
Nr.XVI	Italia	Lombardia	Bergamo	Roncobello			29		6		1970	Valle	75	Glomeris oblongoguttata	1
Nr.XVII	Italia	Lombardia	Bergamo	Oltressenda Alta	Pagherola Bassa	1550	9		8		1982	Bonacina, Lazzaroni, Valle	48	Glomeris oblongoguttata	1
Nr.XVIII	Italia	Lombardia	Bergamo	Entratico	I Moi	520	15	20	6		1957	Bonino	24	Glomeris oblongoguttata	2
Nr.XIX	Italia	Lombardia	Brescia	Ponte Saviore	in pineta sotto sassi		21		7		1963	Negri	44	Glomeris oblongoguttata	1
Nr.XX	Italia	Lombardia	Bergamo	Carona	Laghi Gemelli		15		9		1980		46	Glomeris oblongoguttata	1
Nr.XXI	Italia	Lombardia	Bergamo	Entratico	I Moi				6		1954		56	Glomeris oblongoguttata	2
Nr.XXII	Italia	Lombardia	Bergamo	Bossico			3		9		1959		93	Glomeris oblongoguttata	1
Nr.XXIII	Italia	Lombardia	Bergamo	Selvino		1000	10		8		1959		61	Glomeris oblongoguttata	2
Nr.XXIV	Italia	Lombardia	Bergamo	Premolo	Prateria alpina	1900	4	29	8	9	2004		none	Glomeris oblongoguttata	1	mazeriert
Nr.XXV	Italia	Lombardia	Bergamo	Torre de Busi	Valcava-Monte Albenza		26		9		1956		54	Glomeris oblongoguttata	3
Nr.XXVI	Italia	Lombardia	Bergamo	Roncobello	torrente Valsecca		1		6		1956	Bonino	80	Glomeris oblongoguttata	5
Nr.XXVII	Italia	Lombardia	Sondrio	Val Masino	Filorera, in ghiaione	1000	1		7		1984	Valle	none	Glomeris oblongoguttata	5	4 cf. hexast. & 1 spec.?
Nr.XXVIII	Italia	Lombardia	Bergamo	Villa di Serio	Colli		23		9		1958		2	Glomeris oblongoguttata	7
Nr.XXIX	Italia	Lombardia	Bergamo	Premolo	Baita Camplano	1850	19	22	6	7	2003		none	Glomeris oblongoguttata	9	mazeriert
Nr.XXX	Italia	Lombardia	Bergamo	Premolo	Baita Camplano	1850	22	1	7	10	2003		none	Glomeris oblongoguttata	3	mazeriert
Nr.XXXI	Italia	Lombardia	Bergamo	Torre de Busi	Valcava	1300	19		8		1959		8	Glomeris oblongoguttata	9

## Sheet: Furchen
G. aurita	G. aurita	G. aurita	G. aurita	G. aurita	G. aurita	G. aurita	G. aurita	G. aurita	G. aurita	G. oblongoguttata	G. oblongoguttata	G. oblongoguttata	G. oblongoguttata	G. oblongoguttata	G. oblongoguttata	G. oblongoguttata	G. oblongoguttata	G. oblongoguttata	G. oblongoguttata	G. oblongoguttata	G. oblongoguttata	G. oblongoguttata	G. oblongoguttata	G. oblongoguttata	G. oblongoguttata	G. oblongoguttata	G. oblongoguttata	G. oblongoguttata	G. oblongoguttata	G. oblongoguttata
Nr.I	Nr.II	Nr.III	Nr.IV	Nr.V	Nr.VI	Nr.VII	Nr.VIII	Nr.IX	Nr.X	Nr.XI	Nr.XII	Nr.XIII	Nr.XIV	Nr.XV	Nr.XVI	Nr.XVII	Nr.XVIII	Nr.XIX	Nr.XX	Nr.XXI	Nr.XXII	Nr.XXIII	Nr.XXIV	Nr.XXV	Nr.XXVI	Nr.XXVII	Nr.XXVIII	Nr.XXIX	Nr.XXX	Nr.XXXI
0,1,2	0,1,3	0,1,3	0,1,3	0,1,3	0,1,2	0,1,3	0,1,3	0,1,3	0,1,2	1,0,5	0,0,3	1,0,6	1,0,5	0,0,3	1,0,4	0,0,4	0,0,4	1,0,4	1,0,4	0,0,3	0,0,3	1,0,4	1,0,4	1,0,4	1,0,4	0,0,4	1,0,2	1,0,4	1,0,3	1,0,4
0,1,2	1,2,2	0,1,3	0,1,2		0,1,4	0,1,3	0,1,2	0,1,3	0,1,3	1,0,6		1,0,6	2,0,5				Brust fehlt			0,0,4		0,0,4		1,0,4	1,0,2	1,0,4	1,0,2	1,0,3	1,0,3	1,0,4
0,1,2		1,1,2	1,1,2		0,1,3	0,1,3		0,1,3	0,1,2	1,0,7			0,0,4											1,0,4	1,0,2	1,0,4	1,0,3	1,0,2	2,0,4	2,0,4
0,1,3		0,1,3	1,1,3			0,1,3			0,1,2	1,0,6															1,0,4	1,0,2	verdreckt & segmentiert	1,0,4		1,0,4
0,1,3		0,1,3	1,1,3			0,1,3			0,1,2																1,0,4		verdreckt & segmentiert	1,0,4		1,0,4
0,1,3			0,1,3			0,1,2																					1,0,2	1,0,3		zu verfettet
0,1,2			0,1,3			0,1,3																					1,0,3	1,0,2		1,0,4
1,1,3			1,1,2			0,1,2																						1,0,2		1,0,3
1,1,4			1,1,3			0,1,2																						1,0,3		1,0,3
1,1,3			1,1,3			0,1,3
0,1,3			0,1,3			0,1,2
			0,1,3
			0,1,3
			1,1,3
			1,1,2
			0,1,3
			0,1,3
			0,1,2
			zu kaputt
